# Supplementary material
Source: PubMed Central journal article supplement (PMC7366811)
Supplement: NIHPP3606354-supplement-1.pdf [file NIHPP3606354-supplement-1.pdf]

**A**

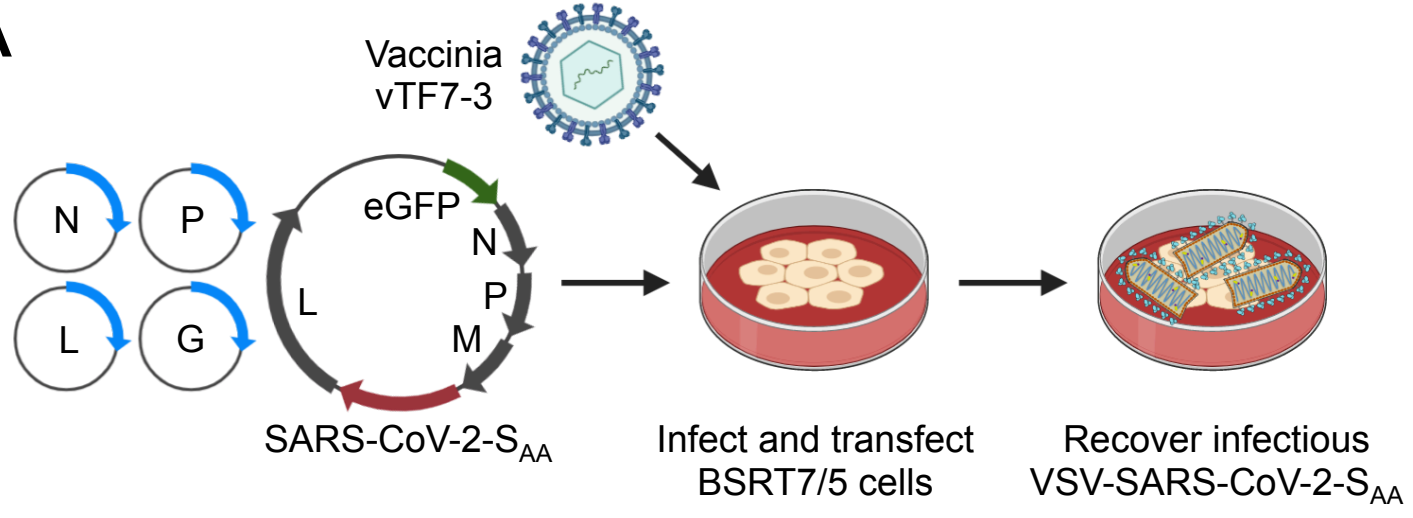

**B**

| Tail Mutant          | Amino acid sequence (membrane proximal region, transmembrane domain, cytoplasmic tail) | Rescue | Spread |
|----------------------|----------------------------------------------------------------------------------------|--------|--------|
| S <sub>AA</sub>      | LNESLIDLQELGKYEQYIKWPWYIWLGFIAGLIAIVMVTIMLCCMTSCCCLKGCCSCGSCCKFDEDDSEPVLKGVALAYT       | +      | +      |
| MERS S <sub>AA</sub> | LNESLIDLQELGKYEQYIKWPWYIWLGFIAGLIAIVMVTIMLKLKCNRCDDRYEEDLEPHAVAVH                      | +      | -      |
| VSV G #1             | LNESLIDLQELGKYEQYIKWPWYIWLGFIAGLIAIVMVTIMLCCMTSCCCLRVGIYLCIKLKHTKKRQIYTDIEMNRLGK       | +      | -      |
| VSV G #2             | LNESLIDLQELGKYEQYIKWPWYIWLGFIAGLIAIVMVTIMLRVGIYLCIKLKHTKKRQIYTDIEMNRLGK                | +      | -      |
| VSV G TM/tail        | LNESLIDLQELGKYEQYIKWSSIASFCFIIGLIIGLFLVLRVGIYLCIKLKHTKKRQIYTDIEMNRLGK                  | +      | -      |
| VSV G Ecto/TM/tail   | LNEGWFSSWKSSIASFCFIIGLIIGLFLVLRVGIYLCIKLKHTKKRQIYTDIEMNRLGK                            | +      | -      |

**C**

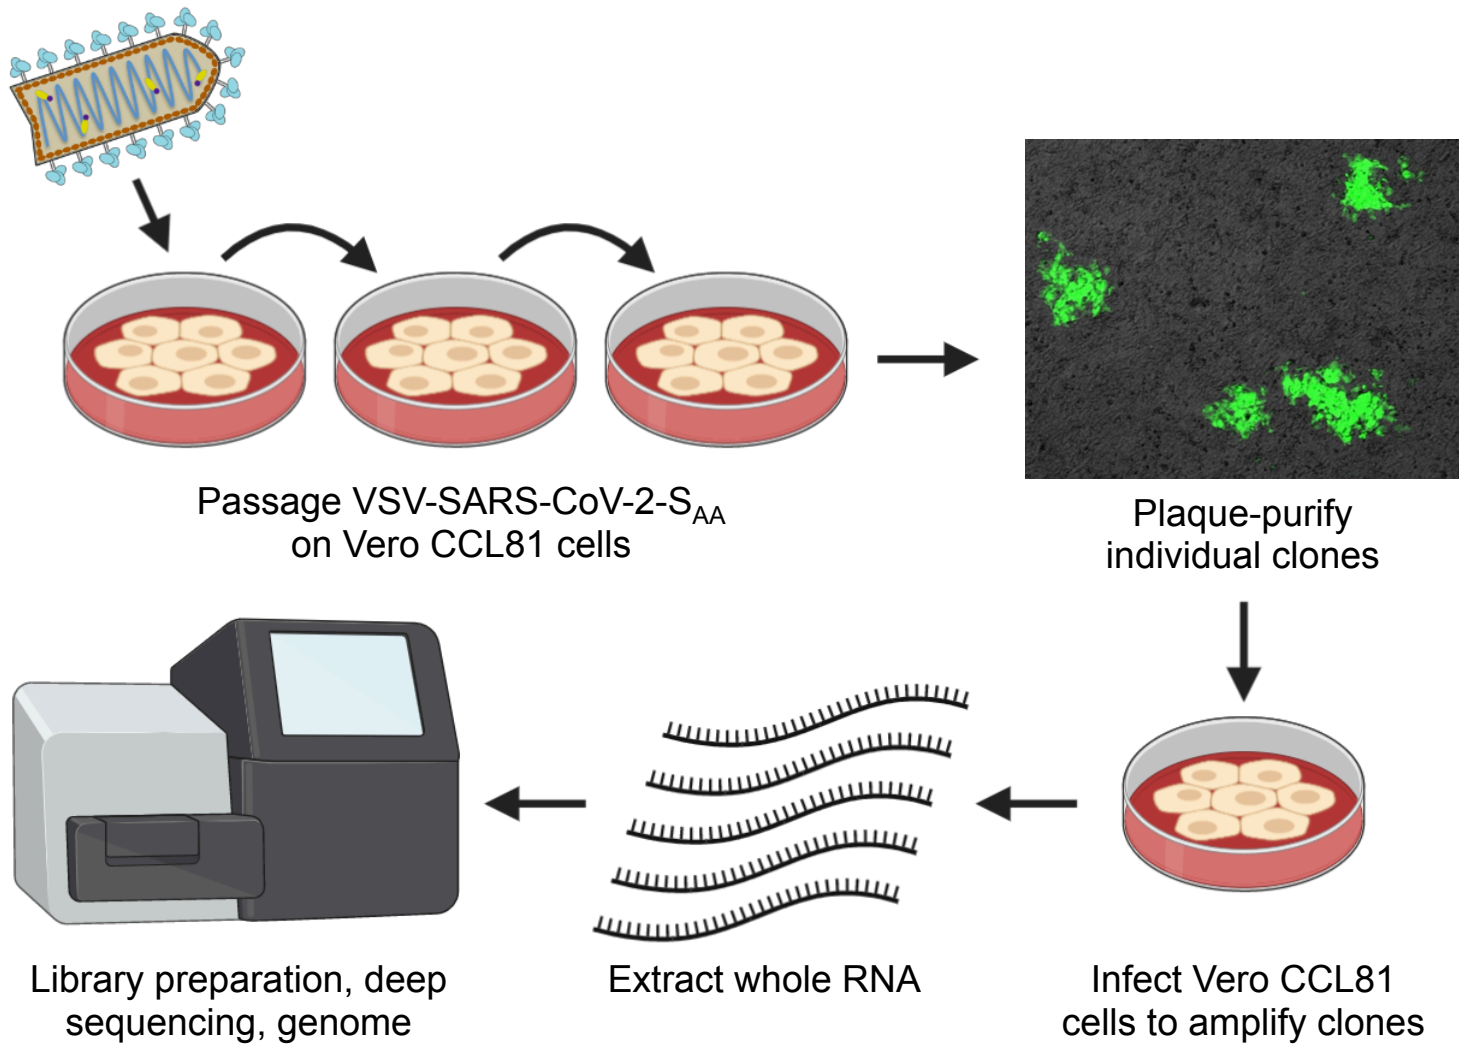

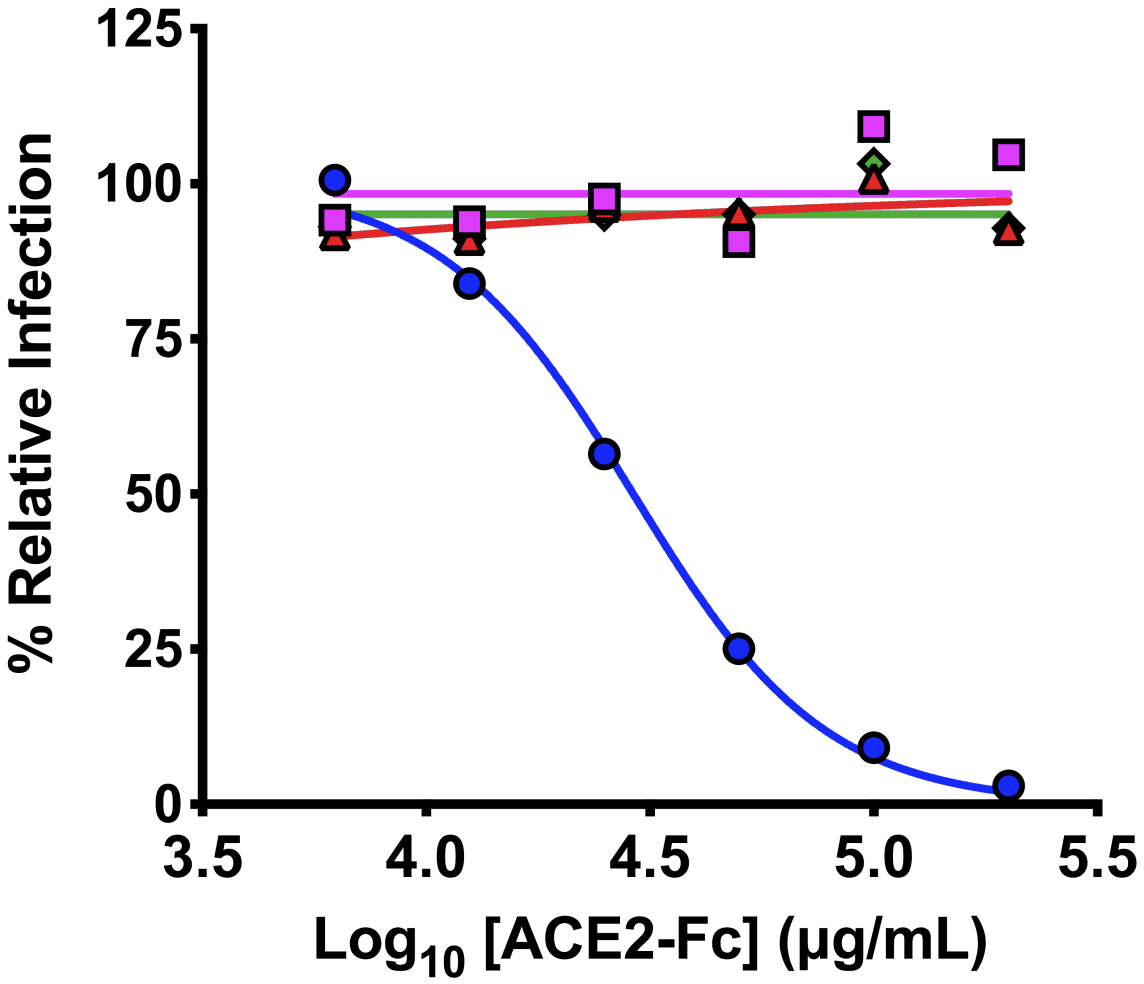

- VSV-SARS-CoV-2-S<sub>Δ21</sub> + hACE2-Fc
- ▲ VSV + hACE2-Fc
- VSV-SARS-CoV-2-S<sub>Δ21</sub> + mACE2-Fc
- ◆ VSV + mACE2-Fc

SARS-CoV-2

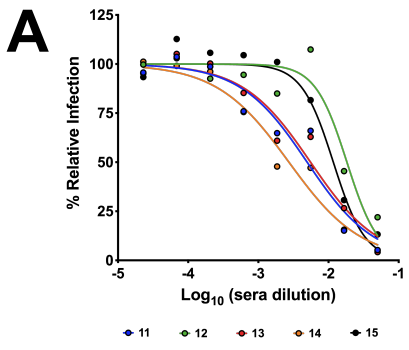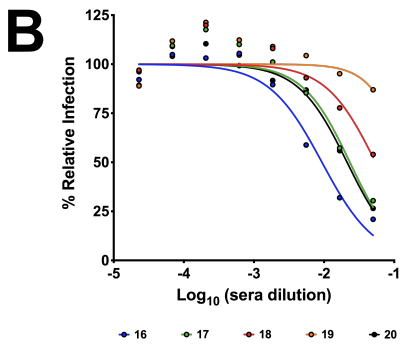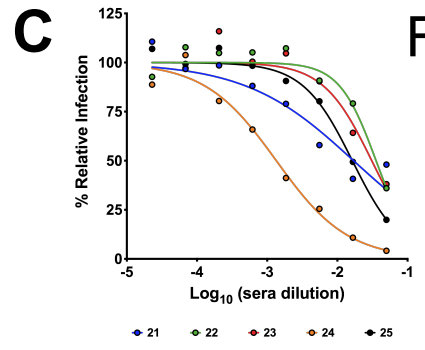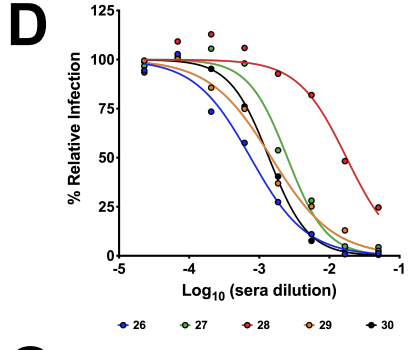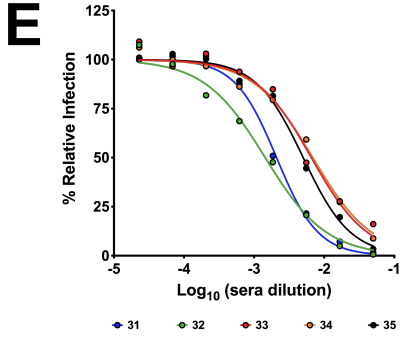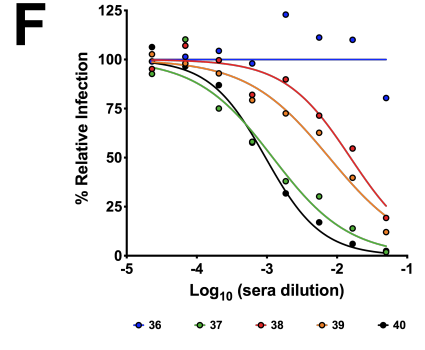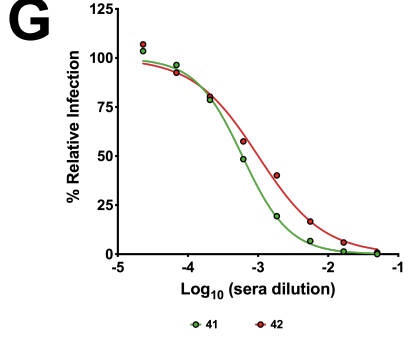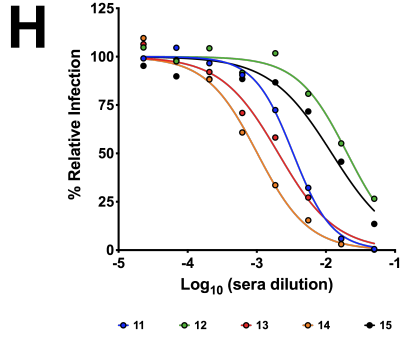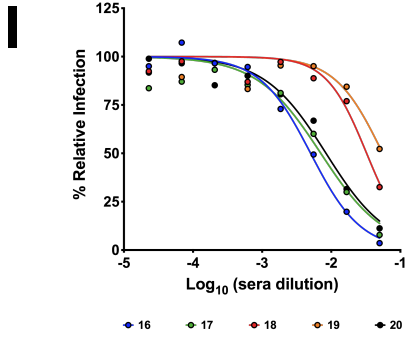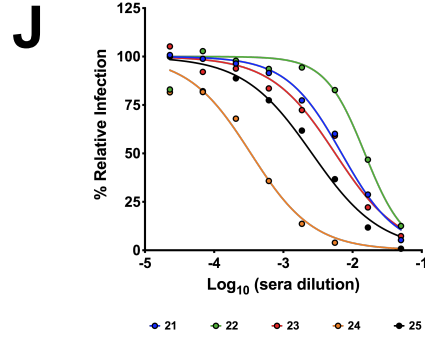

VSV-SARS-CoV-2-S<sub>Δ21</sub>

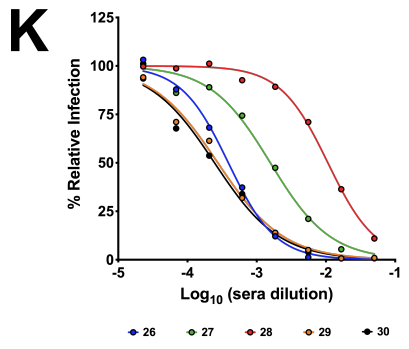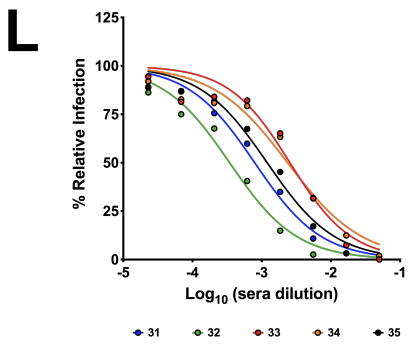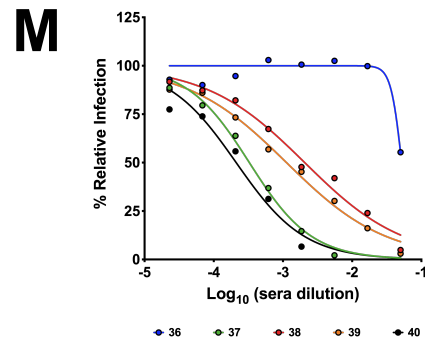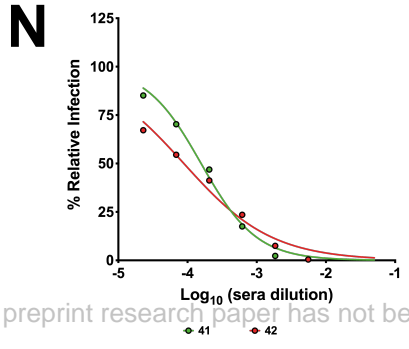

## Supplemental Data.

### Antigenomic (+ sense) sequence of VSV-eGFP-SARS-CoV-2-S<sub>Δ21</sub>:

5' ACGACAAACAAACCATTTATTATCATTTAAAAGGCTCAGGAGAAACTTTAACAGTAATCAGAAT  
TCTCGAGATGGTGGAGCAAGGGCGAGGAGCTGTTACCCGGGGTGGTGGCCATCCTGGTTCGAGCTG  
GACGGCGACGTAAACGGCCACAAGTTTCAGCGTGTCCGGCGAGGGCGAGGGCGATGCCACCTACG  
GCAAGCTGACCCTGAAGTTCATCTGCACCACCGGCAAGCTGCCCGTGCCCTGGCCACCCTCGT  
GACCACCCTGACCTACGGCGTGCAGTGCTTCAGCCGTACCCCGACCACATGAAGCAGCAGCAGC  
TTCTTCAAGTCCGCCATGCCCGAAGGCTACGTCCAGGAGCGCACCATCTTCTTCAAGGACGACG  
GCAACTACAAGACCCGCGCCGAGGTGAAGTTCGAGGGCGACACCCTGGTGAACCGCATCGAGCT  
GAAGGGCATCGACTTCAAGGAGGACGGCAACATCCTGGGGCACAAGCTGGAGTACAACACTACAAC  
AGCCACAACGTCTATATCATGGCCGACAAGCAGAAGAACGGCATCAAGGTGAACCTCAAGATCC  
GCCACAACATCGAGGACGGCAGCGTGCAGCTCGCCGACCACTACCAGCAGAACACCCCCATCGG  
CGACGGCCCCGTGCTGCTGCCCGACAACCACTACCTGAGCACCCAGTCCGCCCTGAGCAAAGAC  
CCCAACGAGAAGCGCGATCACATGGTCTTGCTGGAGTTCGTGACCGCCGCCGGGATCACTCTCG  
GCATGGACGAGCTGTACAAGTGATGGCCATATGAAAAAACTAACAGTAATCAAAATGTCTGTT  
ACAGTCAAGAGAATCATTTGACAACACAGTCATAGTTCCAAAACCTTCTGCAAATGAGGATCCAG  
TGGAATACCCGGCAGATTACTTTCAGAAAATCAAAGGAGATTCTCTTTACATCAATACTACAAA  
AAGTTTGTTCAGATCTAAGAGGATATGTCTACCAAGGCCTCAAATCCGGAATGTATCAATCATA  
CATGTCAACAGCTACTTGTATGGAGCATTAAGGACATCCGGGGTAAGTTGGATAAAGATTGGT  
CAAGTTTCGGAATAAACATCGGGAAAGCAGGGGATACAATCGGAATATTTGACCTTGTATCCTT  
GAAAGCCCTGGACGGCGTACTTCCAGATGGAGTATCGGATGCTTCCAGAACCAGCGCAGATGAC  
AAATGGTTGCCTTTGTATCTACTTGGCTTATACAGAGTGGGCAGAACACAAATGCCTGAATACA  
GAAAAAAGCTCATGGATGGGCTGACAAATCAATGCAAAATGATCAATGAACAGTTTGAACCTCT  
TGTGCCAGAAGGTCGTGACATTTTTGATGTGTGGGGAAATGACAGTAATTACACAAAAAATTGTC  
GCTGCAGTGGACATGTTCTTCCACATGTTCAAAAAACATGAATGTGCCTCGTTCAGATACGGAA  
CTATTGTTTCCAGATTCAAAGATTGTGCTGCATTTGGCAACATTTGGACACCTCTGCAAAAATAAC  
CGGAATGTCTACAGAAGATGTAACGACCTGGATCTTGAACCGAGAAGTTGCAGATGAAATGGTC  
CAAATGATGCTTCCAGGCCAAGAAATTGACAAGGCCGATTCATACATGCCTTATTTGATCGACT  
TTGGATTGTCTTCTAAGTCTCCATATTCTTCCGTCAAAAACCCTGCCTTCCACTTCTGGGGGCA  
ATTGACAGCTCTTCTGCTCAGATCCACCAGAGCAAGGAATGCCCGACAGCCTGATGACATTGAG  
TATACATCTCTTACTACAGCAGGTTTTGTTGTACGCTTATGCAGTAGGATCCTCTGCCGACTTGG  
CACAACAGTTTTTGTGTTGGAGATAACAAATACACTCCAGATGATAGTACCGGAGGATTGACGAC  
TAATGCACCGCCACAAGGCAGAGATGTGGTCGAATGGCTCGGATGGTTTGAAGATCAAAACAGA  
AAACCGACTCCTGATATGATGCAGTATGCGAAAAGAGCAGTCATGTCACTGCAAGGCCTAAGAG  
AGAAGACAATTGGCAAGTATGCTAAGTCAGAATTTGACAAATGACCCTATAATTTCTCAGATCAC  
CTATTATATATTATGCTACATATGAAAAAACTAACAGATATCATGGATAATCTCACAAAAGTT  
CGTGAGTATCTCAAGTCTTACTCTCGTCTAGATCAGGCGGTAGGAGAGATAGATGAGATCGAAG  
CACAACGAGCTGAAAAGTCCAATTATGAGTTGTTCCAAGAGGACGGAGTGGAAAGAGCATACTAG  
GCCCTCTTATTTTCAGGCAGCAGATGATTCTGACACAGAATCTGAACCAGAAATTGAAGACAAT  
CAAGGCTTGTATGTACCAGATCCGGAAGCTGAGCAAGTTGAAGGCTTTATACAGGGGCCTTTAG  
ATGACTATGCAGATGAGGACGTGGATGTTGTATTTCACTTCCGACTGGAAACAGCCTGAGCTTGA  
ATCCGACGAGCATGGAAGACCTTACGGTTGACATTGCCAGAGGGTTTAAAGTGGAGAGCAGAAA  
TCCCAGTGGCTTTTTCAGGATTAAGCAGTCGTTCAAAGTGCCAAACACTGGAATCTGGCAGAGT  
GCACATTTGAAGCATCGGGAGAAGGGGTCATCATAAAAAAGCGCCAGATAACTCCGGATGTATA  
TAAGGTCCTCCAGTGTGAACACACATCCGTACCAATCAGAAGCCGTATCAGATGTTTGGTCT  
CTCTCAAAGACATCCATGACTTTCCAACCCAAGAAAGCAAGTCTTCAGCCTCTCACCATATCCT  
TGGATGAATTGTTCTCATCTAGAGGAGAATTCATCTCTGTTCGGAGGTAACGGACGAATGTCTCA

TAAAGAGGCCATCCTGCTCGGTCTGAGGTACAAAAAGTTGTACAATCAGGCGAGAGTCAAATAT  
TCTCTGTAGACTATGAAAAAAGTAACAGATATCACAATCTAAGTGTTATCCCAATCCATTCAT  
CATGAGTTCCTTAAAGAAGATTCTCGGTCTGAAGGGGAAAGGTAAGAAATCTAAGAAATTAGGG  
ATCGCACCACCCCTTATGAAGAGGACACTAGCATGGAGTATGCTCCGAGCGCTCCAATTGACA  
AATCCTATTTTGGAGTTGACGAGATGGACACCTATGATCCGAATCAATTAAGATATGAGAAAT  
CTTCTTTACAGTGAAAAATGACGGTTAGATCTAATCGTCCGTTTCCAGAACATACTCAGATGTGGCA  
GCCGCTGTATCCCATTTGGGATCACATGTACATCGGAATGGCAGGGAAACGTCCCTTCTACAAAA  
TCTTGGCTTTTTTGGGTTCTTCTAATCTAAAGGCCACTCCAGCGGTATTGGCAGATCAAGGTCA  
ACCAGAGTATCACGCTCACTGCGAAGGCAGGGCTTATTTGCCACATAGGATGGGGAAAGACCCCT  
CCCATGCTCAATGTACCAGAGCACTTCAGAAGACCATTCAATATAGGTCTTTACAAGGGAACGA  
TTGAGCTCACAATGACCATCTACGATGATGAGTCACTGGAAGCAGCTCCTATGATCTGGGATCA  
TTTCAATTCTTCCAAATTTTCTGATTTTCCAGAGAGAAGGCCTTAATGTTTGGCCTGATTGTGCGAG  
AAAAAGGCATCTGGAGCGTGGGTCCTGGATTCTATCAGCCACTTCAAATGAGCTAGTCTAGCTT  
CCAGCTTCTGAACAATCCCCGGTTTACTCAGTCTCTCCTAATTCAGCCTTTTGAACAACCTAAT  
ATCCTGTCTTTTTCTATCCCTATGAAAAAACTAACAGAGATCGATCTGTTTCCCTTGACACGCGT  
ACCATGTTTGTTTTTCTTGTTTTTATTGCCACTAGTCTCTAGTCAGTGTGTTAATCTTACAACCA  
GAACTCAATTACCCCTGCATACACTAATTTCTTTCACACGTGGTGTTTATTACCCTGACAAAGT  
TTTCAGATCCTCAGTTTTACATTCAACTCAGGACTTGTTCTTACCTTTCTTTTCCAATGTTACT  
TGGTTCATGCTATAACATGTCTCTGGGACCAATGGTACTAAGAGGTTTGATAACCCCTGTCCTAC  
CATTTAATGATGGTGTTTATTTTGGCTTCCACTGAGAAGTCTAACATAATAAGAGGCTGGATTTT  
TGGTACTACTTTAGATTCGAAGACCCAGTCCCTACTTATTGTTAATAACGCTACTAATGTTGTT  
ATTAAGTCTGTGAATTTCAATTTTGTAAATGATCCATTTTTGGGTGTTTATTACCACAAAAACA  
ACAAAAGTTGGATGGAAAGTGAGTTCAGAGTTTATTCTAGTGCGAATAATTGCACTTTTGAATA  
TGTCTCTCAGCCTTTTCTTATGGACCTTGAAGGAAAACAGGGTAATTTCAAAAATCTTAGGGAA  
TTTGTGTTTAAAGAATATTGATGGTTATTTTAAAATATATTCTAAGCACACGCCTATTAATTTAG  
TGCCTGATCTCCCTCAGGTTTTTTCGGCTTTAGAACCATTGGTAGATTTGCCAATAGGTATTAA  
CATCACTAGGTTTCAAACCTTACTTGTCTTACATAGAAGTTATTTGACTCCTGGTGATTTCTTCT  
TCAGGTTGGACAGCTGGTGCTGCAGCTTATTATGTGGGTTATCTTCAACCTAGGACTTTTCTAT  
TAAAATATAATGAAAATGGAACCATTACAGATGCTGTAGACTGTGCACTTGACCCTCTCTCAGA  
AACAAAGTGTACGTTGAAATCCTTCACTGTAGAAAAAGGAATCTATCAAACCTTCTAACTTTAGA  
GTCCAACCAACAGAATCTATTGTTAGATTTCCCTAATATTACAACTTGTGCCCTTTTGGTGAAG  
TTTTTAACGCCACCAGATTTGCATCTGTTTATGCTTGGAAACAGGAAGAGAATCAGCAACTGTGT  
TGCTGATTATTCTGTCTTATATAATTCCGCATCATTTTTCCACTTTTAAAGTGTATGGAGTGTCT  
CCTACTAAATTAATGATCTCTGCTTTACTAATGTCTATGCAGATTCATTTGTAATTAGAGGTG  
ATGAAGTCAGACAAATCGCTCCAGGGCAAACCTGGAAAGATTGCTGATTATAATTATAAATTACC  
AGATGATTTTACAGGCTGCGTTATAGCTTGGAAATCTAACAACTTTGATTCTAAGGTTGGTGGT  
AATTATAATTACCTGTATAGATTGTTTGGAAAGTCTAATCTCAAACCTTTTGGAGAGAGATATTT  
CAACTGAAATCTATCAGGCCGGTAGCACACCTTGTAAATGGTGTGTAAGGTTTTAATTGTTACTT  
TCCTTTACAATCATATGGTTTTCCAACCCACTAATGGTGTGGTTACCAACCATAACAGAGTAGTA  
GTACTTTCTTTTGAACCTTCTACATGCACCAGCAACTGTTTGTGGACCTAAAAAGTCTACTAATT  
TGGTTAAAAACAAATGTGTCAATTTCAACTTCAATGGTTTAAACAGGCACAGGTGTTCTTACTGA  
GTCTAACAAAAAGTTTTCTGCCTTTCCAACAATTTGGCAGAGACATTGCTGACACTACTGATGCT  
GTCCGTGATCCACAGACACTTGAGATTCTTGACATTACACCATGTTCTTTTGGTGGTGTGCTAGTG  
TTATAACACCAGGAACAAATACTTCTAACCAGGTTGCTGTTCTTTATCAGGATGTTAACTGCAC  
AGAAGTCCCTGTTGCTATTTCATGCAGATCAACTTACTCCTACTTGGCGTGTTTATTCTACAGGT  
TCTAATGTTTTTCAAACACGTGCAGGCTGTTTAAATAGGGGCTGAACATGTCAACAACCTCATATG  
AGTGTGACATAACCATTTGGTGCAGGTATATGCGCTAGTTATCAGACTCAGACTAATTCTCCTCG

CGGGGCACGTAGTGTAGCTAGTCAATCCATCATTGCCTACACTATGTCACTTGGTGCAGAAAAT  
TCAGTTGCTTACTCTAATAACTCTATTGCCATACCCACAAATTTTACTATTAGTGTTACCACAG  
AAATTCTACCAGTGTCTATGACCAAGACATCAGTAGATTGTACAATGTACATTTGTGGTGATTC  
AACTGAATGCAGCAATCTTTTGTGCAATATGGCAGTTTTTGTACACAATTAACCGTGCTTTA  
ACTGGAATAGCTGTTGAACAAGACAAAAACCCCAAGAAGTTTTTGCACAAGTCAAACAAATTT  
ACAAAACACCACCAATTAAGATTTTTGGTGGTTTTAATTTTTTCACAAATATTACCAGATCCATC  
AAAACCAAGCAAGAGGTCATTTATTGAAGATCTACTTTTTCAACAAAGTGACACTTGCAGATGCT  
GGCTTCATCAAACAATATGGTGATTGCCTTGGTGATATTGCTGCTAGAGACCTCATTTGTGCAC  
AAAAGTTTAACGGCCTTACTGTTTTGCCACCTTTGCTCACAGATGAAATGATTGCTCAATACAC  
TTCTGCACTGTTAGCGGGTACAATCACTTCTGGTTGGACCTTTGGTGCAGGTGCTGCATTACAA  
ATACCATTTGCTATGCAAATGGCTTATAGGTTTAATGGTATTGGAGTTACACAGAATGTTCTCT  
ATGAGAACC AAAAATTGATTGCCAACCAATTTAATAGTGCTATTGGCAAAATTC AAGACTCACT  
TTCTTCCACAGCAAGTGC ACTTGGAAAAC TCAAGATGTGGTCAACCAAAATGCACAAGCTTTA  
AACACGCTTGTTAAACAAC TTAGCTCCAATTTTTGGTGCAATTTCAAGTGT TTTAAATGATATCC  
TTTCACGTCTTGACAAAGTTGAGGCTGAAGTGCAAATGATAGGTTGATCACAGGCAGACTTCA  
AAGTTTGCAGACATATGTGACTCAACAATTAATTAGAGCTGCAGAAATCAGAGCTTCTGCTAAT  
CTTGCTGCTACTAAAATGTCAGAGTGTGTACTTGGACAATCAAAAAGAGTTGATTTTTGTGGAA  
AGGGCTATCATCTTATGTCCTTCCCTCAGTCAGCACCTCATGGTGTAGTCTTCTTGCATGTGAC  
TTATGTCCCTGCACAAGAAAAGAACTTCACAAC TGCCTGCCATTTGTCATGATGGAAAAGCA  
CACTTTCCCTCGTGAAGGTGTCTTTGTTTCAAATGGCACACACTGGTTTGTAACACAAAGGAATT  
TTTATGAACCACAAATCATTACTACAGACAACACATTTGTGTCTGGTAACTGTGATGTTGTAAT  
AGGAATTGTCAACAACACAGTTTATGATCCTTTGCAACCTGAATTAGACTCATTCAAGGAGGAG  
TTAGATAAATATTTTAAGAATCATA CATACCAGATGTTGATTTAGGTGACATCTCTGGCATT A  
ATGCTTCAGTTGTAAACATTC AAAAAGAAATTGACCGCCTCAATGAGGTTGCCAAGAATTTAAA  
TGAATCTCTCATCGATCTCCAAGA ACTTGGAAAGTATGAGCAGTATATAAAATGGCCATGGTAC  
ATTTGGCTAGGTTTTATAGCTGGCTTGATTGCCATAGTAATGGTGACAATTATGCTTTGCTGTA  
TGACCAGTTGCTGTAGTTGTCTCAAGGGCTGTTGTTCTTGTGGATCCTGATGCAAATTTGATGA  
AGACGACTCTGAGCCAGTGCTCAAAGGAGTCGCATTAGCTTACACATAAGCGGCCGCCCTGCAC  
ACAGATTCTTCATGTTTTGAACCAAATCAACTTGTGATATCATGCTCAAAGAGGCCTTAATTATA  
TTTTAATTTTTTAATTTTTTATGAAAAAACTAACAGCAATCATGGAAGTCCACGATTTTGAGACC  
GACGAGTTCAATGATTTCAATGAAGATGACTATGCCACAAGAGAATTCCTGAATCCCGATGAGC  
GCATGACGTACTTGAATCATGCTGATTACAATTTGAATTCTCCTCTAATTAGTGATGATATTGA  
CAATTTGATCAGGAAATTC AATTCTCTTCCGATTCCCTCGATGTGGGATAGTAAGAACTGGGAT  
GGAGTTCTTGAGATGTTAACATCATGTCAAGCCAATCCCATCTCAACATCTCAGATGCATAAAT  
GGATGGGAAGTTGGTTAATGTCTGATAATCATGATGCCAGTCAAGGGTATAGTTTTTTACATGA  
AGTGGACAAAGAGGGCAGAAATAACATTTGACGTGGTGGAGACCTTCATCCGCGGCTGGGGCAAC  
AAACCAATTGAATACATCAAAAAGGAAAGATGGACTGACTCATTCAA AATTTCTCGCTTATTTGT  
GTCAAAGTTTTTTTGACTTACACAAGTTGACATTAATCTTAAATGCTGTCTCTGAGGTGGAATT  
GCTCAACTTGGCGAGGACTTTCAAAGGCAAAGTCAGAAGAAGTTCTCATGGAACGAACATATGC  
AGGATTAGGGTTCCCAGCTTGGGTCTACTTTTTATTT CAGAAGGATGGGCTTACTTCAAGAAAC  
TTGATATTCTAATGGACCGAAACTTTCTGTTAATGGTCAAAGATGTGATTATAGGGAGGATGCA  
AACGGTGCTATCCATGGTATGTAGAATAGACAACCTGTTCTCAGAGCAAGACATCTTCTCCCTT  
CTAAATATCTACAGAATTGGAGATAAAATTTGTGGAGAGGCAGGGAAATTTTTCTTATGACTTGA  
TTAAAATGGTGGAAACCGATATGCAACTTGAAGCTGATGAAATTAGCAAGAGAATCAAGGCCTTT  
AGTCCCACAATTCCTCATTTTTGAAAATCATATCAAGACTTCTGTTGATGAAGGGGCAAAAATT  
GACCGAGGTATAAGATTCCTCCATGATCAGATAATGAGTGTGAAAACAGTGGATCTCACACTGG  
TGATTTATGGATCGTT CAGACATTTGGGGT CATCCTTTTTATAGATTATTACTGGACTAGAAA

ATTACATTCCCAAGTAACCATGAAGAAAGATATTGATGTGTCATATGCAAAAGCACTTGCAAGT  
GATTTAGCTCGGATTGTTCTATTTCAACAGTTCAATGATCATAAAAAGTGGTTCGTGAATGGAG  
ACTTGCTCCCTCATGATCATCCCTTTAAAAGTCATGTTAAAGAAAATACATGGCCACAGCTGC  
TCAAGTTCAAGATTTTGGAGATAAATGGCATGAACTTCCGCTGATTAATGTTTTGAAATACCC  
GACTTACTAGACCCATCGATAATATACTCTGACAAAAGTCATTCATGAATAGGTCAGAGGTGT  
TGAAACATGTCCGAATGAATCCGAACACTCCTATCCCTAGTAAAAAGGTGTTGCAGACTATGTT  
GGACACAAAGGCTACCAATTGGAAAGAATTTCTTAAAGAGATTGATGAGAAGGGCTTAGATGAT  
GATGATCTAATTATTGGTCTTAAAGGAAAGGAGAGGGAAGTGAAGTTGGCAGGTAGATTTTTCT  
CCCTAATGTCTTGGAAATGCGAGAATACTTTGTAATTACCGAATATTTGATAAAGACTCATTT  
CGTCCCTATGTTTAAAGGCTGACAATGGCGGACGATCTAACTGCAGTCATTA AAAAGATGTTA  
GATTCCTCATCCGCCAAGGATTGAAGTCATATGAGGCAATTTGCATAGCCAATCACATTGATT  
ACGAAAAATGGAATAACCACCAAAGGAAGTTATCAAACGGCCAGTGTTCGAGTTATGGGCCA  
GTTCTTAGGTTATCCATCCTAATCGAGAGAACTCATGAATTTTTTGAGAAAAGTCTTATATAC  
TACAATGGAAGACCAGACTTGATGCGTGTTCACAACAACACACTGATCAATTC AACCTCCCAAC  
GAGTTTGTGGCAAGGACAAGAGGGTGGACTGGAAGGTCTACGGCAAAAAGGATGGAGTATCCT  
CAATCTACTGGTTATTCAAAGAGAGGCTAAAATCAGAAACACTGCTGTCAAAGTCTTGGCACAA  
GGTGATAATCAAGTTATTTGCACACAGTATAAACGAAGAAAATCGAGAAACGTTGTAGAATTAC  
AGGGTGTCTCAATCAAATGGTTTCTAATAATGAGAAAATTATGACTGCAATCAAATAGGGAC  
AGGGAAGTTAGGACTTTTGATAAATGACGATGAGACTATGCAATCTGCAGATTACTTGAATTAT  
GGAAAAATACCGATTTTCCGTGGAGTGATTAGAGGGTTAGAGACCAAGAGATGGTCACGAGTGA  
CTTGTGTCACCAATGACCAAATACCCACTTGTGCTAATAATGAGCTCAGTTTTCCACAAATGC  
TCTCACCGTAGCTCATTTTTGCTGAGAACCCAATCAATGCCATGATACAGTACAATTATTTTTGGG  
ACATTTGCTAGACTCTTGTGATGATGCATGATCCTGCTCTTCGTCAATCATTGTATGAAGTTC  
AAGATAAGATACCGGGCTTGACACAGTTCTACTTTCAAATACGCCATGTTGTATTTGGACCCTTC  
CATTGGAGGAGTGTGCGGCATGTCTTTGTCCAGTTTTTTGATTAGAGCCTTCCCAGATCCCGTA  
ACAGAAAGTCTCTCATTCTGGAGATTCATCCATGTACATGCTCGAAGTGAGCATCTGAAGGAGA  
TGAGTGCAGTATTTGGAAACCCCGAGATAGCCAAGTTTCGAATAACTCACATAGACAAGCTAGT  
AGAAGATCCAACCTCTCTGAACATCGCTATGGGAATGAGTCCAGCGAACTTGTTAAAGACTGAG  
GTTAAAAAATGCTTAATCGAATCAAGACAAACCATCAGGAACCAGGTGATTAAGGATGCAACCA  
TATATTTGTATCATGAAGAGGATCGGCTCAGAAGTTTCTTATGGTCAATAAATCCTCTGTTCCC  
TAGATTTTTAAGTGAATTCAAATCAGGCACTTTTTTTGGGAGTCGCAGACGGGCTCATCAGTCTA  
TTTTCAAATTTCTCGTACTATTCGGAACCTTTTAAAGAAAAGTATCATAGGGAATTGGATGATT  
TGATTGTGAGGAGTGAGGTATCCTCTTTGACACATTTAGGGAAACTTCATTTGAGAAGGGGATC  
ATGTA AAAATGTGGACATGTT CAGTACTCATGCTGACACATTAAGATACAAATCCTGGGGCCGT  
ACAGTTATTGGGACAACGTGACCCCATCCATTAGAAATGTTGGGTCCACAACATCGAAAAGAGA  
CTCCTTGTGCACCATGTAACACATCAGGGTTCAATTATGTTTTCTGTGCATTGTCCAGACGGGAT  
CCATGACGTCTTTAGTTCACGGGGACCATTGCCTGCTTATCTAGGGTCTAAAACATCTGAATCT  
ACATCTATTTTGCAGCCTTGGGAAAGGGAAAGCAAAGTCCCACTGATTA AAAAGAGCTACACGTC  
TTAGAGATGCTATCTCTTGGTTTGTGTAACCCGACTCTAAACTAGCAATGACTATACTTTCTAA  
CATCCACTCTTTAACAGGCGAAGAATGGACAAAAGGCAGCATGGGTTCAAAGAACAGGGTCT  
GCCCTTCATAGGTTTTTCGACATCTCGGATGAGCCATGGTGGGTTTCGCATCTCAGAGCACTGCAG  
CATTGACCAGGTTGATGGCAACTACAGACACCATGAGGGATCTGGGAGATCAGAATTTCGACTT  
TTTATTCCAAGCAACGTTGCTCTATGCTCAAATTAACCACCACTGTTGCAAGAGACGGATGGATC  
ACCAGTTGTACAGATCATTATCATATTGCCTGTAAGTCCTGTTTGAGACCCATAGAAGAGATCA  
CCCTGGACTCAAGTATGGACTACACGCCCCAGATGTATCCCATGTGCTGAAGACATGGAGGAA  
TGGGGAAGGTTTCGTGGGGACAAGAGATAAACAGATCTATCCTTTAGAAGGGAATTGGAAGAAT  
TTAGCACCTGCTGAGCAATCCTATCAAGTCGGCAGATGTATAGGTTTTCTATATGGAGACTTGG

CGTATAGAAAATCTACTCATGCCGAGGACAGTTCTCTATTTCTCTATCTATAACAAGGTCGTAT  
TAGAGGTCGAGGTTTCTTAAAAGGGTTGCTAGACGGATTAATGAGAGCAAGTTGCTGCCAAGTA  
ATACACCGGAGAAGTCTGGCTCATTTGAAGAGGCCGGCCAACGCAGTGTACGGAGGTTTGATTT  
ACTTGATTGATAAATTGAGTGTATCACCTCCATTCCTTTCTCTTACTAGATCAGGACCTATTAG  
AGACGAATTAGAAACGATTCCCCACAAGATCCCAACCTCCTATCCGACAAGCAACCGTGATATG  
GGGTGATTGTCAGAAATTACTTCAAATACCAATGCCGTCTAATTGAAAAGGGAAAAATACAGAT  
CACATTATTCACAATTATGGTTATTCTCAGATGTCTTATCCATAGACTTCATTGGACCATTCTC  
TATTTCCACCACCCTCTTGCAAATCCTATAACAAGCCATTTTTATCTGGGAAAGATAAGAATGAG  
TTGAGAGAGCTGGCAAATCTTTCTTCATTGCTAAGATCAGGAGAGGGGTGGGAAGACATACATG  
TGAAATTCTTCACCAAGGACATATTATTGTGTCCAGAGGAAATCAGACATGCTTGCAAGTTCGG  
GATTGCTAAGGATAATAATAAAGACATGAGCTATCCCCCTTGGGGAAGGGAATCCAGAGGGACA  
ATTACAACAATCCCTGTTTATTATACGACCACCCTTACCCAAAGATGCTAGAGATGCCTCCAA  
GAATCCAAAATCCCCTGCTGTCCGGAATCAGGTGGGCAATTACCAACTGGCGCTCATTATAA  
AATTCCGAGTATATTACATGGAATGGGAATCCATTACAGGGACTTCTTGAGTTGTGGAGACGGC  
TCCGGAGGGATGACTGCTGCATTACTACGAGAAAATGTGCATAGCAGAGGAATATTCAATAGTC  
TGTTAGAATTATCAGGGTCAGTCATGCGAGGCGCTCTCCTGAGCCCCCAGTGCCCTAGAAAC  
TTTAGGAGGAGATAAATCGAGATGTGTAAATGGTGAACATGTTGGGAATATCCATCTGACTTA  
TGTGACCCAAGGACTTGGGACTATTTCTCCGACTCAAAGCAGGCTTGGGGCTTCAAATTGATT  
TAATTGTAATGGATATGGAAGTTCGGGATTCTTCTACTAGCCTGAAAATTGAGACGAATGTTAG  
AAATTATGTGCACCGGATTTTGGATGAGCAAGGAGTTTTAATCTACAAGACTTATGGAACATAT  
ATTTGTGAGAGCGAAAAGAATGCAGTAACAATCCTTGGTCCCATGTTCAAGACGGTCGACTTAG  
TTCAAACAGAATTTAGTAGTTCTCAAACGTCTGAAGTATATATGGTATGTAAAGGTTTGAAGAA  
ATTAATCGATGAACCCAATCCCGATTGGTCTTCCATCAATGAATCCTGGAAAAACCTGTACGCA  
TTCCAGTCATCAGAACAGGAATTTGCCAGAGCAAAGAAGGTTAGTACATACTTTACCTTGACAG  
GTATTTCCCTCCCAATTCATTCTGATCCTTTTTGTAAACATTGAGACTATGCTACAAATATTCGG  
AGTACCCACGGGTGTGTCTCATGCCGCTGCCTTAAAATCATCTGATAGACCTGCAGATTTATTG  
ACCATTAGCCTTTTTTTATATGGCGATTATATCGTATTATAACATCAATCATATCAGAGTAGGAC  
CGATACCTCCGAACCCCCCATCAGATGGAATTGCACAAAATGTGGGGATCGCTATAACTGGTAT  
AAGCTTTTGGCTGAGTTTGTATGGAGAAAGACATTCCTACTATATCAACAGTGTGTTGGCAGTTATC  
CAGCAATCATTTCCGATTAGGTGGGAGGCTATTTTCAGTAAAAGGAGGATACAAGCAGAAGTGA  
GTACTAGAGGTGATGGGCTCCCAAAGATAACCGAATTTTCAGACTCCTTGGCCCCAATCGGGAA  
CTGGATCAGATCTTTGGAATTGGTCCGAAACCAAGTTCGTCTAAATCCATTCAATAAGATCTTG  
TTCAATCAGCTATGTCGTACAGTGGATAATCATTTGAAGTGGTCAAATTTGCGAAAAACACAG  
GAATGATTGAATGGATCAATGGGCGAATTTCAAAGAAGACCGGTCTATACTGATGTTGAAGAG  
TGACCTACATGAGGAAAACCTTTGGAGAGATTAATAAATCAGGAGGAGACTCCAACTTTAAGT  
ATGAAAAAACTTTGATCCTTAAGACCCTCTTGTGGTTTTTATTTTTTATCTGGTTTTGTGGTC  
TTCGT
